# Supplementary material for: Tolerance and accumulation of lithium in Apocynum pictum Schrenk
Source: PeerJ. 2018 Aug 29;6:e5559. doi: 10.7717/peerj.5559 (PMC6119463; doi:10.7717/peerj.5559)
Supplement: Supplemental Information 1 — Four replicates of 25 seeds germinated under 0 (distilled water), 25, 50, 100, 150, 200, 300 and 400 mmol L −1 LiCl. The number of germinated seeds was counted every day. Each data point indicates the number of germinated seeds. [file peerj-06-5559-s001.xlsx]

## Sheet: germination data
	LiCl concentration mol L-1	1d	2d	3d	4d	5d	6d	7d	8d	9d	10d	11d	12d	13d	14d	15d
	0	0	11	8	2	0	0	0	0	0	0	0	0	0	0	0
	0	0	10	9	2	0	0	0	0	0	0	0	0	0	0	0
	0	0	12	10	0	0	0	0	0	0	0	0	0	0	0	0
	0	0	14	9	1	0	0	0	0	0	0	0	0	0	0	0
	25	0	10	12	0	0	0	0	0	0	0	0	0	0	0	0
	25	0	19	4	0	0	0	0	0	0	0	0	0	0	0	0
	25	0	12	12	0	0	0	0	0	0	0	0	0	0	0	0
	25	0	12	10	0	0	0	0	0	0	0	0	0	0	0	0
	50	0	11	9	0	0	0	1	0	0	0	0	0	0	0	0
	50	0	10	11	1	0	0	0	0	0	0	0	0	0	0	0
	50	0	10	11	0	0	0	0	0	0	0	0	0	0	0	0
	50	0	9	11	0	0	0	0	0	0	0	0	0	0	0	0
	100	0	4	14	1	1	0	0	0	0	0	0	0	0	0	0
	100	0	5	14	1	1	1	0	0	0	0	0	0	0	0	0
	100	0	7	11	0	0	1	0	0	0	0	0	0	0	0	0
	100	0	5	12	1	0	2	0	0	0	0	0	0	0	0	0
	150	0	3	8	6	2	1	0	0	0	0	0	0	0	0	0
	150	0	3	7	6	2	1	0	0	1	1	0	0	0	0	0
	150	0	2	5	4	2	2	1	1	1	0	0	0	0	0	0
	150	0	4	4	3	2	2	1	0	0	1	1	0	0	0	0
	200	0	0	4	2	0	4	0	1	1	0	0	0	0	0	0
	200	0	0	3	3	0	2	2	1	1	1	0	0	0	0	0
	200	0	0	4	2	2	1	2	1	2	0	0	0	0	0	0
	200	0	0	2	3	3	3	2	1	1	0	0	0	0	0	0
	300	0	0	0	0	0	0	2	1	2	1	0	1	0	0	0
	300	0	0	0	0	1	0	1	2	0	1	1	0	0	0	0
	300	0	0	0	0	0	0	2	2	0	1	0	0	0	0	0
	300	0	0	0	0	0	1	2	1	1	1	1	0	0	0	0
	400	0	0	0	0	0	0	0	0	1	0	1	1	0	0	0
	400	0	0	0	0	0	0	0	0	0	1	0	1	0	0	0
	400	0	0	0	0	0	0	0	1	0	0	0	0	0	0	0
	400	0	0	0	0	0	0	0	0	0	0	0	0	0	0	0
