# Supplementary material for: Tolerance and accumulation of lithium in Apocynum pictum Schrenk
Source: PeerJ. 2018 Aug 29;6:e5559. doi: 10.7717/peerj.5559 (PMC6119463; doi:10.7717/peerj.5559)
Supplement: Supplemental Information 3 — Each data point indicates weight, contents of photosynthetic pigments or Li in different organs of Apocynum pictum. Eight replicates for each treatment. [file peerj-06-5559-s003.xlsx]

## Sheet: biomass and chl
		Weight							Content of photosynthetic pigments
Li content mg kg-1	leaf	stem	root			Li content	OD470	OD646	OD663	Chl a	Chl b	Car
0	4.53	4.3	5.27			0	1.9102	0.6951	1.8648	2.0816	0.461242	0.810215
0	5.06	5.37	4.97			0	2.1776	0.8389	2.1922	2.44095	0.586029	0.920799
0	5.51	3.82	6.16			0	1.9386	0.754	1.9603	2.18165	0.531771	0.819268
0	4.18	3.67	5.59			0	1.3069	0.3813	1.0647	1.19285	0.232013	0.558451
0	3.1	4.73	6.61			0	1.4352	0.4711	1.2662	1.41365	0.311426	0.610553
0	3.22	4.83	4.38			0	1.266	0.427	1.1892	1.33203	0.261383	0.539058
0	3.98	3.8	5.67			0	1.4995	0.5154	1.3645	1.52123	0.351157	0.636673
0	3.92	3.93	4.43			0	1.7099	0.6375	1.6455	1.83002	0.455601	0.723363
50	4.34	4.86	4.22			50	1.9102	0.7539	1.9636	2.18571	0.52991	0.806945
50	5.73	4.97	7.33			50	1.6073	0.6347	1.6585	1.84668	0.443426	0.679089
50	4.97	5.72	7.44			50	1.377	0.5019	1.3747	1.53747	0.318851	0.584624
50	5.18	3.23	5.43			50	2.2188	0.8472	2.141	2.3761	0.628491	0.936953
50	3.52	3.8	4.21			50	1.959	0.8173	1.8627	2.0447	0.708287	0.82035
50	3.82	3.73	4.78			50	1.7218	0.5556	1.4878	1.66048	0.370059	0.732689
50	5.65	5.57	8.5			50	1.7511	0.6528	1.7242	1.92181	0.446814	0.741623
50	3.16	3.73	4.17			50	2.2291	0.8226	2.143	2.38545	0.577965	0.943734
200	2.15	2.45	2.8			200	0.7834	0.2796	0.7612	0.850858	0.179951	0.332703
200	1.74	2.61	2.61			200	0.7229	0.2716	0.7277	0.812202	0.180698	0.306305
200	1.87	1.46	3.01			200	0.9894	0.3688	0.9474	1.05314	0.265852	0.418467
200	1.95	1.83	2.16			200	0.6923	0.256	0.7013	0.784351	0.162574	0.293806
200	2.58	2.53	4.6			200	0.6161	0.2374	0.6071	0.67456	0.172515	0.260236
200	3.53	2.37	3.44			200	1.148	0.4549	1.2367	1.38218	0.293654	0.485991
200	2.64	2.37	3.57			200	1.1814	0.4353	1.1581	1.29172	0.293735	0.500702
200	2.67	3.21	3.48			200	0.4724	0.1735	0.4568	0.508999	0.119485	0.200131
400	0.61	0.92	1.21			400	0.4273	0.1445	0.3807	0.42423	0.0993864	0.181471
400	1.03	1.1	1.88			400	0.5247	0.1915	0.4877	0.54167	0.140176	0.221983
400	1.09	1.62	2.01			400	0.4988	0.1824	0.4598	0.510161	0.135892	0.210912
400	1.07	0.9	1.71			400	0.1395	0.0393	0.1378	0.157211	0.0097975	0.0602473
400	0.94	1.61	2.7			400	0.4225	0.1424	0.3801	0.424088	0.0954609	0.179554
400	1.01	1.04	2.03			400	0.2874	0.0778	0.21	0.234548	0.0509814	0.12285
400	0.64	0.78	2.05			400	0.1857	0.0571	0.1419	0.157215	0.0435666	0.0788873
400	0.93	0.98	1.91			400	0.4089	0.1485	0.373	0.413705	0.111311	0.17291

## Sheet: Li content of different organs
LiCl content mg kg-1	leaf mg kg-1	stem mg kg-1	root mg kg-1
0	19.72	12.025	11.318
0	18.011	15.197	10.356
0	21.553	14.162	11.994
0	15.519	12.809	9.326
0	20.073	12.632	11.347
0	21.521	13.604	13.02
0	18.549	16.285	12.793
0	19.454	14.288	13.061
50	821.905	280.678	96.306
50	868.25	293.755	134.207
50	680.938	409.361	110.93
50	476.422	338.361	107.722
50	1094.91	328.576	104.277
50	989.989	318.066	148.011
50	1334.85	451.43	145.455
50	1140.66	443.668	130.93
200	1562.36	1187.86	426.846
200	1640.24	1072.81	500.29
200	1915.08	733.249	528.5
200	1728.7	785.769	414.484
200	2332.84	1044.01	289.996
200	1564.6	1274.5	473.494
200	2218.13	901.486	505.218
200	1562.36	824.322	405.37
400	1070.87	737.79	490.332
400	1451.35	777.883	443.342
400	1307.41	738.43	597.781
400	1407.71	830.001	510.818
400	1500.95	665.965	452.222
400	1190.47	1055.69	607.113
400	1131.93	936.261	419.282
400	1307.4	967.242	433.156
